# THE AMERICAN JOURNAL OF PSYCHIATRY

---

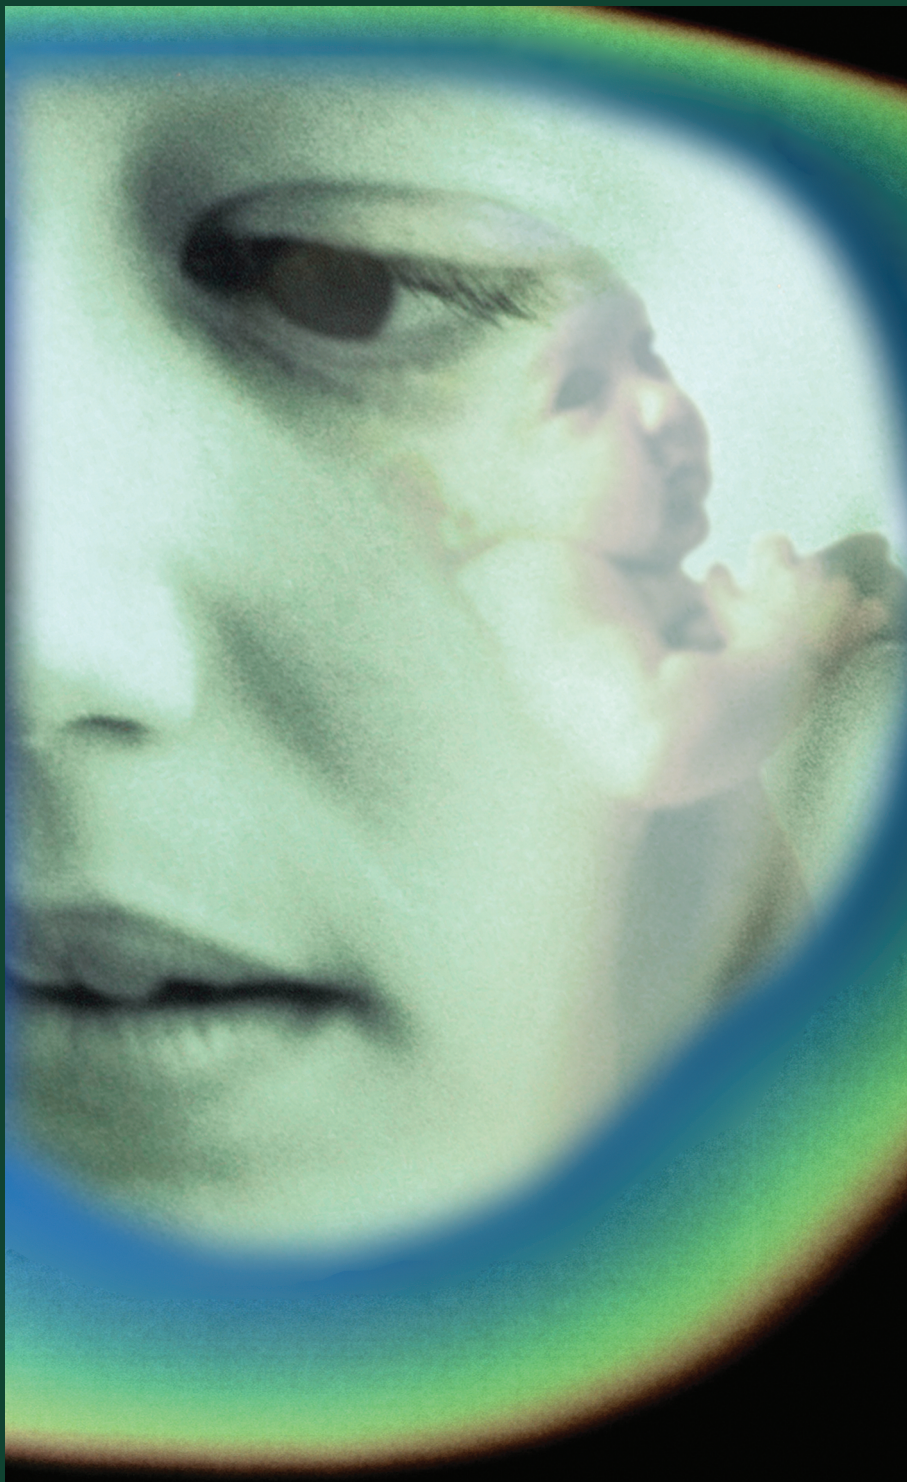

**Presentation and Management of  
Psychosis in Parkinson's Disease and  
Dementia With Lewy Bodies**  
Daniel Weintraub and  
Howard I. Hurtig 1491

**Clinically Identified Maternal  
Depression Before, During, and After  
Pregnancies Ending in Live Births**  
Patricia M. Dietz et al. 1515

**Association of Different Adverse Life  
Events With Distinct Patterns of  
Depressive Symptoms**  
Matthew C. Keller et al. 1521

**Genetic Markers of Suicidal Ideation  
Emerging During Citalopram  
Treatment of Major Depression**  
Gonzalo Laje et al. 1530

**Continuing Medical Education** 1622

**October 2007**

**Volume 164 • Number 10**

---

Official Journal of the  
AMERICAN PSYCHIATRIC ASSOCIATION

---

[ajp.psychiatryonline.org](http://ajp.psychiatryonline.org)

# THE AMERICAN JOURNAL OF PSYCHIATRY

## EDITOR-IN-CHIEF

Robert Freedman, M.D.

## DEPUTY EDITORS

David A. Lewis, M.D.

Robert Michels, M.D.

Daniel S. Pine, M.D.

Susan K. Schultz, M.D.

Carol A. Tamminga, M.D.

## EDITORIAL STAFF

### Editorial Director

Michael D. Roy

### Senior Editor/Features Writer

Jane Weaver, E.L.S.

### Senior Editors

John J. Guardiano, Ph.D.  
Leannah M. Harding, M.S., E.L.S.

### Assistant Editors

Lisa Devine  
Angela Moore

### Production Editor

Julie C. Blair

### Senior Graphic Designer

Jason Glance

### Editorial Manager

Molly Douglas

### Editorial Assistant

Samantha Luck

### Assistants to the Editors

Lois Campbell  
Keriann Hansen  
Rachel Hogg  
Russell A. Scholl

## ASSOCIATE EDITORS

Wade H. Berrettini, M.D., Ph.D.

Kathleen T. Brady, M.D., Ph.D.

David P. Brent, M.D.

Linda Brzustowicz, M.D.

Cameron S. Carter, M.D.

Leon Eisenberg, M.D.

Glen O. Gabbard, M.D.

Howard H. Goldman,  
M.D., Ph.D.

Jeffrey A. Lieberman, M.D.

Robert C. Malenka, M.D., Ph.D.

Maria A. Oquendo, M.D.

Barbara L. Parry, M.D.

Jerrold F. Rosenbaum, M.D.

Larry J. Siever, M.D.

Patricia Suppes, M.D., Ph.D.

Myrna M. Weissman, Ph.D.

## EDITORS EMERITI

Nancy C. Andreasen,  
M.D., Ph.D.

John C. Nemiah, M.D.

## FORMER EDITORS

Amariah Brigham, M.D.  
1844-1849

T. Romeyn Beck, M.D.  
1849-1854

John P. Gray, M.D.  
1854-1886

G. Alder Blumer, M.D.  
1886-1894

Richard Dewey, M.D.  
1894-1897

Henry M. Hurd, M.D.  
1897-1904

Edward N. Brush, M.D.  
1904-1931

Clarence B. Farrar, M.D.  
1931-1965

Francis J. Braceland, M.D.  
1965-1978

The American Journal of Psychiatry is online at [ajp.psychiatryonline.org](http://ajp.psychiatryonline.org)

# THE AMERICAN JOURNAL OF PSYCHIATRY

Official Journal of the American Psychiatric Association

## Instructions for Activating Your Online Subscription

All subscribers to the print edition of *The American Journal of Psychiatry* are automatically eligible to view the *Journal* online. The online version of the *Journal* allows you to conduct searches for topics of interest in issues going all the way back to 1844. Plus the only way readers can participate in the *Journal's* new CME Course program is to have an activated online subscription (note: there is an additional annual fee to be enrolled and eligible to receive up to 36 hours of category 1 CME credit).

To activate your online subscription:

Make sure you have your customer identification number available. This number is printed on your *Journal* mailing label, directly above your name and address. If you cannot locate this number, please contact American Psychiatric Publishing, Inc., through one of the following methods:

- e-mail: [accessnumber@psych.org](mailto:accessnumber@psych.org)
- phone: (800) 368-5777
- fax: (703) 907-1091
- mail:

American Psychiatric Publishing, Inc.  
1000 Wilson Blvd., Suite 1825  
Arlington, VA 22209-3901  
Attn: Circulation Department.

Internet: <http://www.psychiatryonline.org>. Click on the "Subscriptions" button located near the bottom of the page. Then click on the appropriate link:

- ACTIVATE Your Member or Individual (Nonmember) Subscription

For APA Members, you will find your member number on the mailing label above your name. It is

a 10-digit number beginning with zeros. Enter your number in the box and click the SUBMIT button.

For Individual Nonmembers and Institutions, your customer number is on the mailing label above your name. It is a 10-digit number beginning with 22 or 30. Enter this number in the box and click the SUBMIT button.

Fill out all the information on the next screen and press the "Send Form" button at the bottom on the right.

When finished, click the "Done" button. You will receive an e-mail confirmation that your subscription has been activated.

**Continuing Medical Education:** You now have an opportunity to earn CME credits by reading articles in *The American Journal of Psychiatry*. Three articles in each issue will each comprise a short course for up to 1 hour category 1 CME credit each. The course comprises reading the article and answering three multiple-choice questions with a single correct answer. CME Credit is issued only online. Readers who want credit must subscribe to the AJP Continuing Medical Education Course program (APA Members: \$97.00 per year; Nonmember subscribers: \$144.00 per year; nonmember nonsubscribers: \$180.00 per year). Go to [cme.psychiatryonline.org](http://cme.psychiatryonline.org), select *The American Journal of Psychiatry* at that site, take the course(s) of your choosing, complete the evaluation form, and submit your answers for CME credit. In the online course, correct answers will be highlighted for your reference; there is no minimum threshold score necessary for the credit. A link from the question to the correct answer in context will be highlighted in the associated article. A certificate for each course will be generated upon successful completion.

The American Journal of Psychiatry is online at [ajp.psychiatryonline.org](http://ajp.psychiatryonline.org)

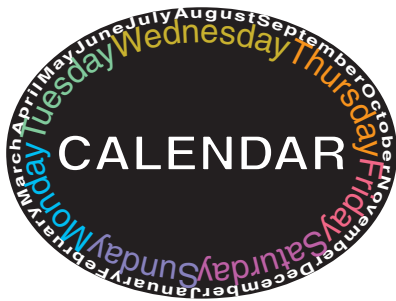

For free listing of your organization's official annual or regional meeting, please send us the following information: sponsor, location, inclusive dates, type and number of continuing education credits (if available), and the name, address, and telephone number of the person or group to contact for more information. In order for an event to appear in our listing, all notices and changes must be received at least 6 months in advance of the meeting and should be addressed to:

Calendar, American Journal of Psychiatry, 1000 Wilson Boulevard, Suite 1825, Arlington, VA 22209-3901, [jblair@psych.org](mailto:jblair@psych.org) (e-mail).

Because of space limitations, only listings of meetings of the greatest interest to Journal readers will be included.

---

## OCTOBER

**October 6–7**, 6th NYU Reproductive Psychiatry Conference, New York. Contact: Dr. Shari I. Lusskin, Director of Reproductive Psychiatry, New York University School of Medicine, 155 East 29th Street, Suite 26J, New York, NY 10016; (212) 263-5295 (tel), [www.med.nyu.edu/cme](http://www.med.nyu.edu/cme) (web site).

**October 7–11**, 15th World Congress on Psychiatric Genetics, New York. Contact: Lynn E DeLisi, International Society of Psychiatric Genetics, NYU School of Medicine, 650 First Avenue, 5th Floor Room 543, New York, NY 10016; (212) 263-3420 (tel), (212) 263-3407 (fax), [DeLisi76@AOL.com](mailto:DeLisi76@AOL.com) (e-mail), [www.WCPG2007.com](http://www.WCPG2007.com) (web site).

**October 11-14**, 59th Institute on Psychiatric Services, American Psychiatric Association, New Orleans, LA. Contact: Jill Gruber, APA Annual Meetings Dept., 1000 Wilson Blvd., Ste. 1825, Arlington, VA 22209; (703) 907-7815.

**October 23–28**, 54th Annual Meeting of the American Academy of Child and Adolescent Psychiatry, Boston. Contact: AACAP, 3615 Wisconsin Avenue, N.W., Washington, DC 20016-3007; (202) 966-7300 (tel), (202) 966-2891 (fax), [meetings@aacap.org](mailto:meetings@aacap.org) (e-mail), [www.aacap.org](http://www.aacap.org) (web site).

---

## DECEMBER

**December 8**, 4th annual Child Mental Health Symposium, Tucson, AZ. Contact: Professional Development Office, University of Arizona College of Medicine, Department of Psychiatry, PO Box 245002, 1501 N. Campbell Ave. #7423, Tucson, AZ 85724-5002; (520) 626-1392 (tel), (520) 626-5732 (fax), [uapsycon@email.arizona.edu](mailto:uapsycon@email.arizona.edu) (e-mail), [www.psychiatry.arizona.edu](http://www.psychiatry.arizona.edu) (web site).

**December 8**, The Winter Meeting of the American Academy of Psychoanalysis

and Dynamic Psychiatry, Tempe, AZ. Contact: Executive Office, American Academy of Psychoanalysis and Dynamic Psychiatry, PO Box 30, Bloomfield, CT 06002; (888) 691-8281 (tel), (860) 286-0787 (fax), [info@aapdp.org](mailto:info@aapdp.org) (e-mail), [www.aapdp.org](http://www.aapdp.org) (web site).

---

## FEBRUARY 2008

**February 15–18**, 21st Annual Meeting of the American Association for Geriatric Psychiatry, Washington, DC. Contact: AAGP, 7910 Woodmont Ave., Ste. 1050, Bethesda, MD 20814-3004; (301) 654-7850 (tel), (301) 654-4137 (fax), [www.aagpmeeting.org](http://www.aagpmeeting.org) (web site).

**February 27–March 2**, Annual meeting of the American College of Psychiatrists, Kauai, Hawaii. Contact: American College of Psychiatrists, 122 S. Michigan Ave., Ste. 1360, Chicago, IL 60603; (312) 662-1020 (tel), (312) 662-1025 (fax), [maureen@acpsych.org](mailto:maureen@acpsych.org) (e-mail).

---

## MARCH

**March 1–4**, 19th Annual Meeting of the American Neuropsychiatric Association, Savannah, GA. Contact: ANPA Office; (614) 447-2077 (tel), (614) 263-4366 (fax), [anpa@osu.edu](mailto:anpa@osu.edu) (e-mail), [www.anpaonline.org](http://www.anpaonline.org) (web site).

**March 14–17**, 21st Annual Meeting of the American Association for Geriatric Psychiatry, Orlando. Contact: AAGP, 7910 Woodmont Ave., Ste. 1050, Bethesda, MD 20814-3004; (301) 654-7850 (tel), (301) 654-4137 (fax), [www.aagpmeeting.org](http://www.aagpmeeting.org) (web site).

**March 15**, 7th Annual Women's Mental Health Symposium, Tucson, AZ. Contact: Professional Development Office, University of Arizona College of Medicine, Department of Psychiatry, PO Box 245002, 1501 N. Campbell Ave. #7423, Tucson, AZ 85724-5002; (520) 626-1392 (tel),

(520) 626-5732 (fax), [uapsycon@email.arizona.edu](mailto:uapsycon@email.arizona.edu) (e-mail), [www.psychiatry.arizona.edu](http://www.psychiatry.arizona.edu) (web site).

**March 26–29**, Annual Meeting and Scientific Sessions of the Society of Behavioral Medicine, San Diego. Contact: Society of Behavioral Medicine, 17000 Commerce Parkway, Ste. C, Mount Laurel, NJ 08054; (856) 439-1297 (tel), (856) 439-0525 (fax), [info@sbm.org](mailto:info@sbm.org) (e-mail).

---

## APRIL

**April 5–9**, 16th European Congress of Psychiatry, Nice, France. Contact: Congress Secretariat, Kenes International, 17 Rue du Cendrier, PO Box 1726, CH-1211 Geneva 1, Switzerland; (41) 22 908 0488 (tel), (41) 22 732 2850 (fax), [aep@kenes.com](mailto:aep@kenes.com) (e-mail).

---

## MAY

**May 1–4**, The 52nd Annual Meeting of the American Academy of Psychoanalysis and Dynamic Psychiatry, Washington, DC. Contact: Executive Office, American Academy of Psychoanalysis and Dynamic Psychiatry, P. O. Box 30, Bloomfield, CT 06002; (888) 691-8281 (tel), (860) 286-0787 (fax), [info@aapdp.org](mailto:info@aapdp.org) (e-mail) [www.aapdp.org](http://www.aapdp.org) (web site).

**May 3–4**, American Academy of Psychiatry and the Law Semiannual Meeting, Washington, D.C. Contact: One Regency Drive, PO Box 30, Bloomfield, CT 06002-0030; (800) 331-1389, (tel) (860) 286-0787 (fax), [execoff@aapl.org](mailto:execoff@aapl.org) (e-mail).

**May 3–8**, 161st Annual Meeting of the American Psychiatric Association, Washington, DC. Contact: Cathy Nash, APA Annual Meetings Dept., 1000 Wilson Blvd., Ste. 1825, Arlington, VA 22209; (703) 907-7822.

---

Continued on page A32

# THE AMERICAN PSYCHIATRIC ASSOCIATION

1000 Wilson Blvd., Suite 1825, Arlington, VA 22209-3901  
(888) 357-7924 (toll-free inside the U.S. and Canada) / (703) 907-7300  
web site: [www.psych.org](http://www.psych.org) / e-mail: [apa@psych.org](mailto:apa@psych.org)

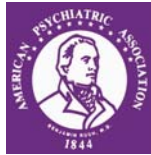

## OFFICERS 2007–2008

|                            |                                |
|----------------------------|--------------------------------|
| <b>President</b>           | Carolyn B. Robinowitz, M.D.    |
| <b>President-Elect</b>     | Nada L. Stotland, M.D., M.P.H. |
| <b>Vice-President</b>      | Carol Bernstein, M.D.          |
| <b>Secretary-Treasurer</b> | Donna M. Norris, M.D.          |

## ASSEMBLY

|                      |                      |
|----------------------|----------------------|
| <b>Speaker</b>       | Jeffrey Akaka, M.D.  |
| <b>Speaker-Elect</b> | Ronald M. Burd, M.D. |
| <b>Recorder</b>      | Gary Weinstein, M.D. |

## MEDICAL DIRECTOR'S OFFICE

|                                                                               |                                   |
|-------------------------------------------------------------------------------|-----------------------------------|
| <b>Medical Director</b>                                                       | James Scully, M.D.                |
| <b>Chief Executive Officer,<br/>American Psychiatric<br/>Publishing, Inc.</b> | Ronald E. McMillen                |
| <b>Executive Director,<br/>APIRE<br/>Division of Research</b>                 | Darrel A. Regier, M.D.,<br>M.P.H. |

## BOARD OF TRUSTEES

|                                    |                                |
|------------------------------------|--------------------------------|
| Thomas K. Ciesla, M.D.             | Steven S. Sharfstein, M.D.     |
| Mary Helen Davis, M.D.             | Anne Marie T. Sullivan, M.D.   |
| David Fassler, M.D.                | John Chapman Urbaitis,<br>M.D. |
| Jeffrey L. Geller, M.D.,<br>M.P.H. | Amy M. Ursano, M.D.            |
| Roger Peele, M.D.                  | Sidney H. Weissman, M.D.       |
| Michelle B. Riba, M.D., M.S.       | William M. Womack, M.D.        |
| Pedro Ruiz, M.D.                   |                                |

## AMERICAN PSYCHIATRIC PUBLISHING, INC.

### BOARD OF DIRECTORS 2006–2009

|                            |                                         |
|----------------------------|-----------------------------------------|
| <b>President and Chair</b> | Alan F. Schatzberg, M.D.                |
| <b>Secretary</b>           | Katharine Phillips, M.D.                |
| <b>Treasurer</b>           | Joan A. Lang, M.D.                      |
| Dwight L. Evans, M.D.      | Pedro Ruiz, M.D.                        |
| John M. Oldham, M.D.       | Donna E. Stewart, M.D.,<br>F.R.C.P.(C.) |
| Laura W. Roberts, M.D.     |                                         |

### EX-OFFICIO MEMBERS

|                                                  |                                |
|--------------------------------------------------|--------------------------------|
| <b>APA President</b>                             | Carolyn B. Robinowitz, M.D.    |
| <b>APA President-Elect</b>                       | Nada L. Stotland, M.D., M.P.H. |
| <b>APA Secretary-Treasurer</b>                   | Donna M. Norris, M.D.          |
| <b>APA Medical Director</b>                      | James Scully, M.D.             |
| <b>Editor-in-Chief,<br/>Psychiatric Services</b> | Howard Goldman, M.D.           |
| <b>Editor-in-Chief, Books</b>                    | Robert E. Hales, M.D., M.B.A.  |

The American Journal of Psychiatry is online at [ajp.psychiatryonline.org](http://ajp.psychiatryonline.org)

## THE AMERICAN PSYCHIATRIC ASSOCIATION Chairpersons of Councils, Commissions, Committees, and Task Forces

### Standing Committees

#### Audit

Donna M. Norris, M.D.

#### Finance and Budget

Jack W. Bonner III, M.D.

#### Bylaws

John O. Gaston, M.D.

#### Elections

Maria T. Lymberis, M.D.

#### Ethics

Wade C. Myers, M.D.

#### Investment Oversight

John G. Looney, M.D.

#### Joint Reference

Nada L. Stotland, M.D.,  
M.P.H.

#### Membership

Joseph Ezra V. Rubin, M.D.

#### Nominating

Pedro Ruiz, M.D.

#### Tellers

William B. Lawson, M.D.,  
Ph.D.

### Council on Addiction Psychiatry

Eric C. Strain, M.D.

#### Training and Education in Addiction Psychiatry

John A. Renner, Jr., M.D.

#### Treatment Services for Patients With Addictive Disorders

Petros Levounis, M.D.

### Council on Advocacy and Public Policy

Roger D. Walker, M.D.

#### Advocacy and Litigation Funding

Jeffrey Stuart Janofsky, M.D.

#### Government Relations

Barry Bruce Perlman, M.D.

#### Public Affairs

William E. Callahan, M.D.

### Council on Aging

Robert Paul Roca, M.D.

#### Access and Effectiveness of Psychiatric Services for the Elderly

James Allen Greene, M.D.

#### Ethnic Minority Elderly

Maria D. Llorente, M.D.

#### Long-Term Care and Treatment for the Elderly

Peter Vincent Rabins, M.D.

### Council on Children, Adolescents, and Their Families

David A. Mrazek, M.D.

#### Developmental Disabilities

Joel D. Bregman, M.D.

#### Family Violence and Abuse

Gail Erlick Robinson, M.D.

#### Blanche F. Ittleson Research Award

Elizabeth B. Weller, M.D.

#### Juvenile Justice Issues

Stephen B. Billick, M.D.

#### Agnes Purcell McGavin Award

John E. Schowalter, M.D.

#### Infancy and Early Childhood

Jean M. Thomas, M.D.

#### Mental Health and Schools

Marcia J. Slattery, M.D.

#### Mental Health on College and University Campuses

Jerald Kay, M.D.

### Council on Global Psychiatry

Lawrence Hartmann,  
M.D.

#### Misuse and Abuse of Psychiatry

Alan A. Stone, M.D.

#### Psychiatric Dimensions of Disasters

S. Arshad Husain, M.D.

### Council on Healthcare Systems and Financing

Anita Smith Everett, M.D.

#### Access to Care and Reimbursement

Donna T. Chen, M.D.

#### APA/Business Relations

Alan Langlieb, M.D.

#### Managed Care

Paul Henry Wick, M.D.

#### Medicare Advisory

Edward Gordon, M.D.

#### Psychiatry in the Workplace

Andrea G. Stolar, M.D.

#### Public Funding for Psychiatric Services

Selby C. Jacobs, M.D.

#### Reimbursement for Psychiatric Care

Joseph T. English, M.D.

#### RBRVS, Codes and Reimbursement

Ronald M. Burd, M.D.

### Council on Medical Education and Lifelong Learning

Sandra Sexson, M.D.

#### APA/Bristol-Myers Squibb Fellowship Selection

David W. Preven, M.D.

#### APA/SAMHSA Minority Fellowship Selection and Advisory

Tana Annette Grady-Weliky,  
M.D.

#### APA/GlaxoSmithKline Fellowship Selection and Program

Leah Joan Dickstein, M.D.

#### APA/Lilly Products Resident Research Award

Charles L. Bowden, M.D.

#### CME/Lifelong Learning

Mark Hyman Rapaport,  
M.D.

#### Commercial Support

Spencer Eth, M.D.

#### Graduate Education

Sidney Herman Weissman,  
M.D.

#### History and Library

Laura D. Hirshbein, M.D.

#### Joint Sponsorship of Continuing Medical Education (CME)

Adam T. Kaul, M.D.

#### Medical Student Education

Linda Faith Pessar, M.D.

#### Psychiatric Administration and Management

L. Mark Russakoff, M.D.

#### Residents and Fellows

Molly K. McVoy, M.D.

#### Scientific Program

David Arnold Baron, M.D.

#### Scientific Program Committee of the Institute on Psychiatric Services

Stephen M. Goldfinger, M.D.

#### Vestermark Award

Frederick G. Guggenheim,  
M.D.

### Council on Member and District Branch Relations

Jeffrey S. Akman, M.D.

#### Distinguished Service Award

Carolyn B. Robinowitz, M.D.

#### Newsletter of the Year

Denis J. Milke, M.D.

#### Physician Health, Illness and Impairment

Malkah T. Notman, M.D.

### Council on Minority Health and Health Disparities

Sandra C. Walker, M.D.

#### American Indian, Alaska Native and Native Hawaiian Psychiatrists

Daniel L. Dickerson, D.O.

#### Asian-American Psychiatrists

Mona H. Gill, M.D.

#### Black Psychiatrists

Michele Reid, M.D.

#### Gay, Lesbian, and Bisexual Issues

Serena Volpp, M.D.

#### Hispanic Psychiatrists

Andres J. Pumariega, M.D.

#### International Medical Graduates

Sanjay Dube, M.D.

#### Religion, Spirituality, and Psychiatry

John Raymond Peteet, M.D.

#### Women

Melva J. Green, M.D.

### Council on Psychiatry And Law

Paul S. Appelbaum, M.D.

#### Confidentiality

William F. Haning, M.D.

#### Isaac Ray Award

J. Richard Ciccone, M.D.

#### Judicial Action

Jeffrey L. Metzner, M.D.

#### Manfred S. Guttmacher Award

Patricia R. Recuperero, M.D.,  
J.D.

### Council on Psychosomatic Medicine

Thomas N. Wise, M.D.

#### Education and Training

Mary Jane Massie, M.D.

#### Research

Joel Edward Dimsdale, M.D.

### Council on Quality Care

Daniel K. Winstead, M.D.

#### AIDS

Francisco Fernandez, M.D.

#### Electronic Health Records

Farrell H. Brazier, M.D.

#### Patient Safety

Alfred Herzog, M.D.

#### Prevention of Mental Disorders and Promotion of Mental Health

William Rigby Beardslee,  
M.D.

#### Psychotherapy by Psychiatrists

Eric Martin Plakun, M.D.

#### Quality Indicators

Marvin I. Herz, M.D.

#### Standards and Survey Procedures

Jeanne L. Steiner, D.O.

#### Steering Committee on Practice Guidelines

John S. McIntyre, M.D.

### Council on Research

Jeffrey A. Lieberman, M.D.

#### Electroconvulsive and Other Electromagnetic Therapies

Sarah H. Lisanby, M.D.

#### Health Services Research

Javier I. Escobar, M.D.

#### Psychiatric Diagnosis and Assessment

Michael B. First, M.D.

#### Research Awards

Stuart C. Yudofsky, M.D.

#### Research Ethics

Laura W. Roberts, M.D.

#### Research on Psychiatric Treatments

Jeffrey A. Lieberman, M.D.

#### Research Training

Charles B. Nemeroff, M.D.

#### Task Force on Complementary and Alternative Medicine

Marlene Picus Freeman,  
M.D.

### Council on Social Issues and Public Psychiatry

Carl Compton Bell, M.D.

#### Mental Healthcare for Veterans & Military Personnel & Their Families

Harold Stephen Kudler,  
M.D.

#### Persons With Mental Illness in the Criminal Justice System

Henry C. Weinstein, M.D.

#### Poverty, Homelessness, and Psychiatric Disorders

Jeffrey Gress Stovall, M.D.

#### Psychiatric Services Achievement Awards

Joel S. Feiner, M.D.

#### Task Force on Forensic Outpatient Services

Steven Kenny Hoge, M.D.

# New Feature for Residents!

## The American Journal of Psychiatry Residents' Journal

A FREE electronic publication produced specifically for psychiatry residents

The Residents' Journal contains special links to full text of the articles from the current *American Journal of Psychiatry* and to AJP Audio, a downloadable MP3 file featuring highlights from the issue. In addition, this e-mail bulletin contains two exclusive features:

### Journal Club Kit

A featured article presented with an overview discussing the reasons for its selection, discussion questions, and an editorial by a senior member of the field placing the article into clinical context.

### Educational Article

Case presentation that illustrates a major point in clinical practice or highlights unique treatment approaches.

Plus lively contributions from your fellow residents:

- Instructive cases
- Unique clinical or educational programs
- Perspectives on training and career development
- Discussions arising from journal club discussions

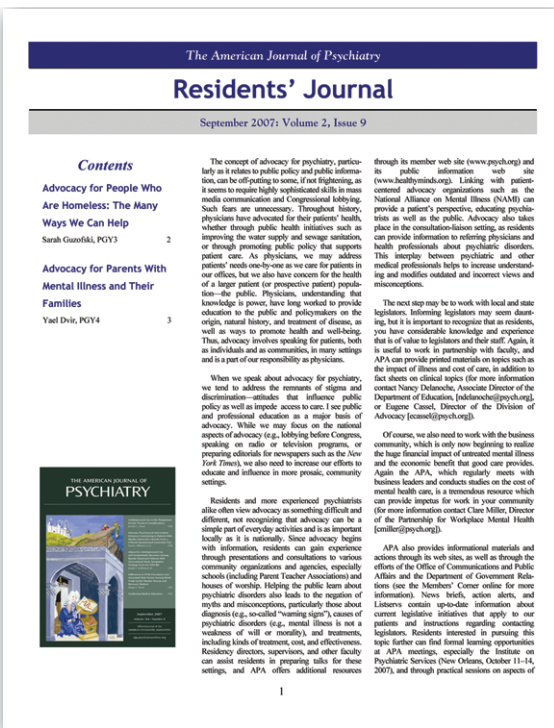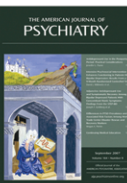

1

The Resident's Journal is sent free-of-charge to all psychiatry residents. Anyone interested in being included on the distribution list should contact Lisa Devine, the Residents' Journal staff editor at [ajp@psych.org](mailto:ajp@psych.org) with "Subscribe to Residents' Journal" in the subject line.

# Psychological Medicine

Volume 37 Number 9 September 2007

## CONTENTS

In this Issue 1215

### REVIEW ARTICLE

**What makes self-help interventions effective in the management of depressive symptoms? Meta-analysis and meta-regression** GELLATLY, J., BOWER, P., HENNESSY, S., RICHARDS, D., GILBODY, S., AND LOVELL, K. 1217

### ORIGINAL ARTICLES

**Successful computer-based cognitive remediation therapy in patients with unipolar depression: a proof of principle study** ELGAMAL, S., MCKINNON, M.C., RAMAKRISHNAN, K., JOFFE, R.T., AND MACQUEEN, G. 1229

**Attitudes to depression and its treatment in primary care** WEICH, S., MORGAN, L., KING, M., AND NAZARETH, I. 1239

**Inhibitory deficits for negative information in persons with major depressive disorder** LAU, M.A., CHRISTENSEN, B.K., HAWLEY, L.L., GEMAR, M.S., AND SEGAL, Z.V. 1249

**Random-mood interpretation of determinants for major depression** KAPTEIN, K.I., DE JONGE, P., KORF, J., SPIJKER, J., DE GRAAF, R., AND VAN DER WERF, S.Y. 1261

**Clinical presentation of postnatal and non-postnatal depressive episodes** COOPER, C., JONES, L., DUNN, E., FORTY, L., HAQUE, S., OYEBODE, F., CRADDOCK, N., AND JONES, I. 1273

**Highly neurotic never-depressed students have negative biases in information processing** CHAN, S.W.Y., GOODWIN, G.M., AND HARMER, C.J. 1281

**Biological markers of intellectual disability in tuberous sclerosis** RAZNAHAN, A., HIGGINS, N.P., GRIFFITHS, P.D., HUMPHREY, A., YATES, J.R.W., AND BOLTON, P.F. 1293

**Psychological distress, physical illness and risk of myocardial infarction in the Caerphilly study** RASUL, F., STANSFELD, S. A., DAVEY SMITH, G., BEN SHILOMO, Y., AND GALLACHER, J. 1305

**Serious psychiatric outcome of subjects prenatally exposed to diethylstilboestrol in the E3N cohort study** VERDOUX, H., ROPERS, J., COSTAGLIOLA, D., CLAVEL-CHAPELON, E., AND PAOLETTI, X. 1315

**The role of perinatal problems for risk of co-morbid psychiatric and medical disorders in adulthood** NOMURA, Y., BROOKS-GUNN, J., DAVEY, C., HAM, J., AND FIFER, W.P. 1323

**Assessment of information processing in working memory in applied settings: the paper & pencil memory scanning test** VAN DER ELST, W., VAN BOXTEL, M.P.J., VAN BREUKELEN, G.J.P., AND JOLLES, J. 1335

**Psychometric properties of DSM assessments of illicit drug abuse and dependence: results from the National Epidemiologic Survey on Alcohol and Related Conditions (NESARC)** LYNSKEY, M.T., AND AGRAWAL, A. 1345

**Exploring the inter-relationship of smoking age-at-onset, cigarette consumption and smoking persistence: genes or environment?** MORLEY, K.I., LYNSKEY, M.T., MADDEN, P.A. F., TRELOAR, S.A., HEATH, A.C., AND MARTIN, N.G. 1357

### BOOK REVIEWS

*Eating Disorders in Children and Adolescents* WRIGHT, S. 1369

*Beyond Nature and Nurture in Psychiatry: Genes, Environment and their Interplay* LEVINSON, D.F. 1370

*Correspondence* 1372

*American Journal of Psychiatry Contents May 2007* 1373



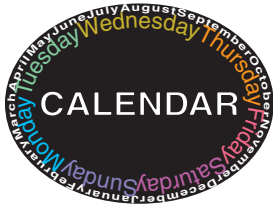

Continued from page A8

**May 29–31**, International Congress of Dual Pathology 2008, Madrid. Contact: Technical Secretariat, Tilea OPC, Londres, 17 - 28028, Madrid, Spain; (34) 91 361 12600 (tel), (34) 91 355 9208, secretariat@cipd2008.com (e-mail), www.cipd2008.com (web site).

## JUNE

**June 19–21**, Thematic Conference on Depression and Relevant Psychiatric Condition in Primary Care, Granada, Spain. Contact: Francisco Torres-González, Andalusian Research Group on Mental Health, University of Granada, Avenida de Madrid 11, Granada 18071, Spain; (34) 958-272651 (tel), (34) 958-275214 (fax), ftorres@ugr.es (e-mail).

## CONTENTS (Continued from page A5)

### Cover

Research on maternal depression is reviewed in this issue in an editorial by Yonkers (p. 1457). A study by Dietz et al. (p. 1515) of HMO medical records for 4,400 women found that more than half of women with postpartum depression had been depressed before or during pregnancy. Fewer depressed women took antidepressants during pregnancy and the proportion of those receiving psychosocial treatment did not rise. Cover design by Jason Glance.

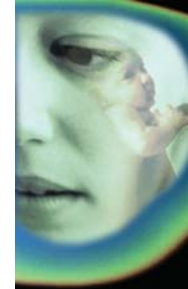

## OCTOBER

**October 2–5**, 60th Institute on Psychiatric Services, American Psychiatric Association, Chicago, IL. Contact: Jill Gruber, APA Annual Meetings Dept., 1000 Wilson Blvd., Ste. 1825, Arlington, VA 22209; (703) 907-7815.

**October 28–November 2**, 55th Annual Meeting of the American Academy of Child and Adolescent Psychiatry, Chicago. Contact: AACAP, 3615 Wisconsin Avenue, N.W., Washington, DC 20016-3007; (202) 966-7300 (tel), (202) 966-2891 (fax), meetings@aacap.org (e-mail), www.aacap.org (web site).

## NOVEMBER

**November 23–28**, Canadian Psychiatric Association 58th Annual Meeting, Vancouver, British Columbia, Canada. Contact: 260-441 MacLaren Street, Ottawa, ON K2P 2H3, Canada; (800) 267-1555 (tel), (613) 234-9857 (fax), cpa@medical.org (e-mail).

## FEBRUARY 2009

**February 25–March 1**, American College of Psychiatrists Annual Meeting, Tucson, AZ. Contact: 122 South Michigan Avenue, Suite 1360, Chicago, IL 60603; (312) 662-1020 (tel), (312) 662-1025 (fax), angel@ACPsych.org (e-mail).

## Coming in the November 2007 issue

### THE AMERICAN JOURNAL OF PSYCHIATRY

*Affective Disorders and Cognitive Failures: A Comparison of Seasonal and Non-Seasonal Depression*

B. Sullivan and T. Payne

*Childhood Psychiatric Disorders and Young Adult Crime: A Prospective, Population-Based Study*

W. Copeland, S. Miller-Johnson, G. Keeler, A. Angold, and E.J. Costello

*A Randomized Controlled Proof of Concept Trial of an Internet-Based Therapist-Assisted Self-Management Treatment for Posttraumatic Stress Disorder*

B. Litz, C. Engel, R. Bryant, and A. Papa

*Failure of Extinction of Fear Responses in Posttraumatic Stress Disorder: Evidence From Second-Order Conditioning*

M. Wessa and H. Flor

*Serotonin Transporter Genotype and Social Support: Moderate Posttraumatic Stress Disorder and Depression in Hurricane-Exposed Adults*

D. Kilpatrick, K. Koenen, K. Ruggiero, R. Acierno, S. Galea, H. Resnick, J. Roitzsch, J. Boyle, and J. Gelernter
