# THE AMERICAN JOURNAL OF PSYCHIATRY

---

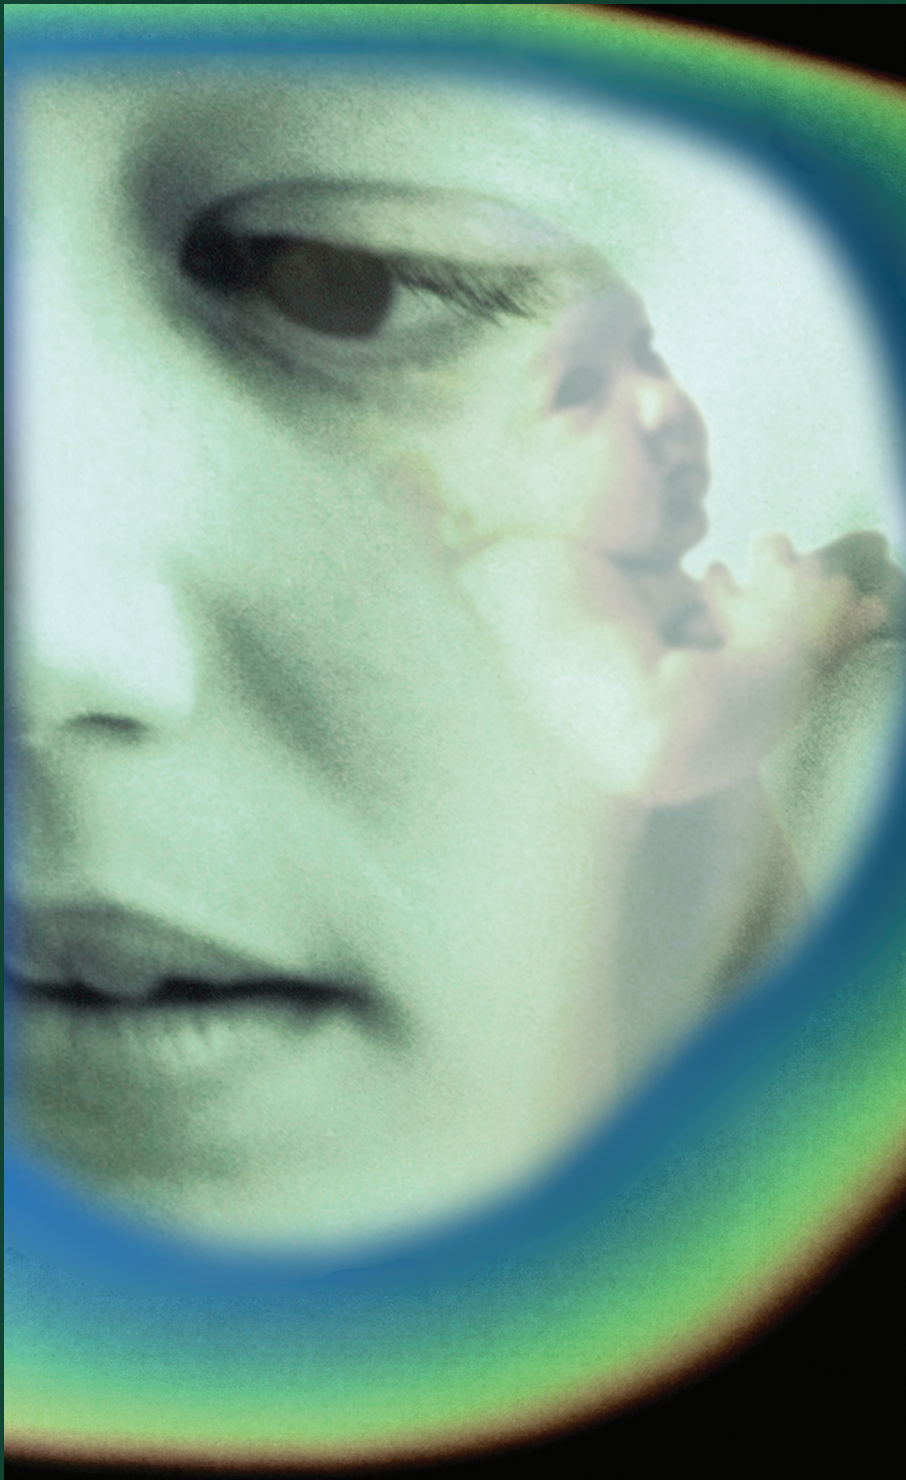

**Presentation and Management of  
Psychosis in Parkinson's Disease and  
Dementia With Lewy Bodies**  
Daniel Weintraub and  
Howard I. Hurtig 1491

**Clinically Identified Maternal  
Depression Before, During, and After  
Pregnancies Ending in Live Births**  
Patricia M. Dietz et al. 1515

**Association of Different Adverse Life  
Events With Distinct Patterns of  
Depressive Symptoms**  
Matthew C. Keller et al. 1521

**Genetic Markers of Suicidal Ideation  
Emerging During Citalopram  
Treatment of Major Depression**  
Gonzalo Laje et al. 1530

**Continuing Medical Education** 1622

**October 2007**

**Volume 164 • Number 10**

---

Official Journal of the  
AMERICAN PSYCHIATRIC ASSOCIATION

---

[ajp.psychiatryonline.org](http://ajp.psychiatryonline.org)
